# Supplementary material for: New elevation data triple estimates of global vulnerability to sea-level rise and coastal flooding
Source: PubMed Central journal article supplement (PMC6820795; doi:10.1038/s41467-019-12808-z), 2019-10-29
Supplement: 41467_2019_12808_MOESM2_ESM.pdf [file 41467_2019_12808_MOESM2_ESM.pdf]

New Elevation Data Triple Estimates of Global Vulnerability to Sea-Level Rise and Coastal Flooding

Supplementary Information  
Kulp et al.

Supplementary Table 1

| Model      | Year | RCP 2.6          | RCP 4.5          | RCP 8.5          |
|------------|------|------------------|------------------|------------------|
| <b>K14</b> | 2050 | 0.24 (0.18-0.33) | 0.26 (0.18-0.35) | 0.29 (0.21-0.39) |
|            | 2100 | 0.49 (0.28-0.84) | 0.59 (0.35-0.95) | 0.79 (0.51-1.23) |
| <b>K17</b> | 2050 | 0.23 (0.12-0.41) | 0.26 (0.14-0.43) | 0.31 (0.17-0.48) |
|            | 2100 | 0.56 (0.26-0.98) | 0.91 (0.50-1.58) | 1.46 (0.93-2.43) |

Global mean sea-level rise projections. Models include K14[1], a probabilistic sea-level rise projection that makes simplifying assumptions about Antarctic ice sheet contributions, and K17[2], a non-probabilistic projection that incorporates physical models of ice sheet dynamics. Units are in meters. Median + 90% CI are presented.

Supplementary References

- [1] Kopp, R. E. et al. Probabilistic 21st and 22nd century sea-level projections at a global network of tide-gauge sites. *Earth's Future* 2, 383–406 (2014).
- [2] Kopp, R. E. et al. Evolving Understanding of Antarctic Ice-Sheet Physics and Ambiguity in Probabilistic Sea-Level Projections. *Earth's Future* 5, 1217–1233 (2017).
